# Supplementary material
Source: ML conference proceedings conference paper supplement (https://proceedings.neurips.cc/paper_files/paper/2007/hash/818f4654ed39a1c147d1e51a00ffb4cb-Abstract.html)
Supplement: Supplementary file 2 [file 818f4654ed39a1c147d1e51a00ffb4cb-Supplemental.zip]

Archive with 1 entries (1 files):
- NIPS2007_1082_correction.pdf
